# Supplementary material
Source: PubMed Central journal article supplement (PMC4725063)

Figure S1

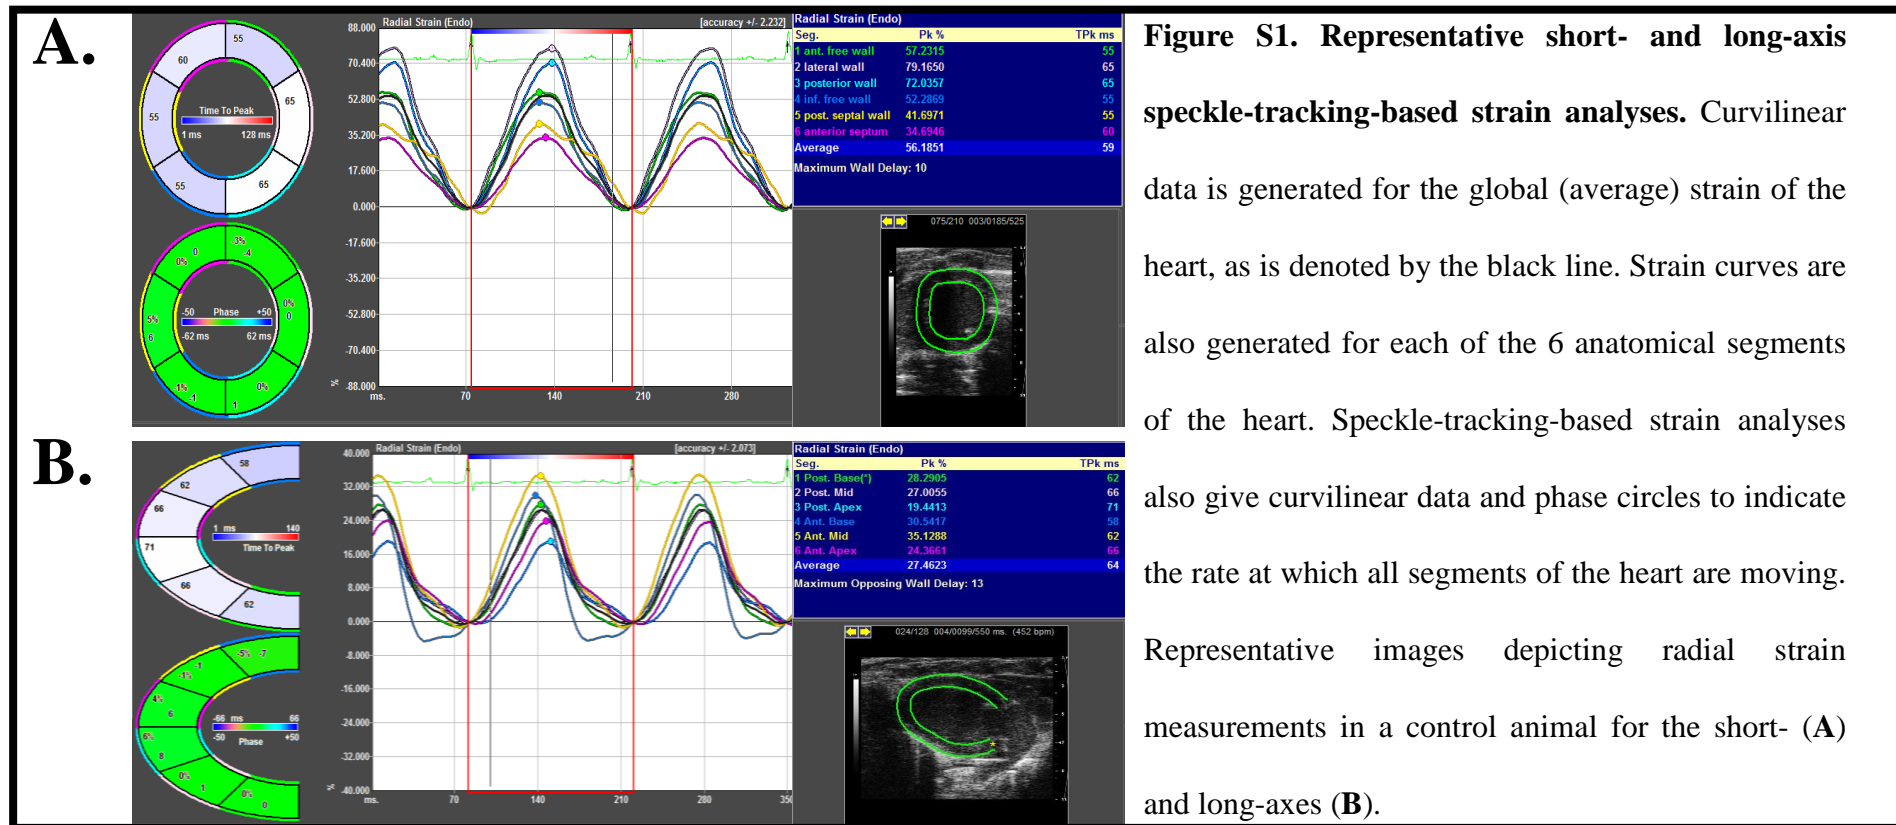

Supplement: NIHMS746620-supplement-01.pdf [file NIHMS746620-supplement-01.pdf]
